# Supplementary material for: Intraspecific Trait Variability Determines Understorey Plant Community Assembly
Source: Research Square preprint supplement (doi:10.21203/rs.3.rs-1159070/v1), 2021-12-29
Supplement: Supplementary file 1 [file a9444eead4c4212e7af1d477.xlsx]

## Sheet: Plant data
Appendix 1
Intraspecific trait variability determines understorey plant community assembly
Piotr Olszewski, Radosław Puchałka, Piotr Sewerniak, Marcin Koprowski, Werner Ulrich
Table S1: Raw measurements of 1315 single Impatiens parviflora ramets. LDW: leaf dry weight, SH: stem height, SLA: specific leaf area.
Sub-plot	LDW (g)	SH {cm)	SLA	Number of leaves	Number of ramets	Number of flowers
B14_7	0.1376	22	122.399	10	34	12
B14_7	0.0243	14.3	105.868	4	34	4
B14_7	0.1659	19.2	108.569	12	34	12
B14_7	0.0215	11.5	134.564	6	34	2
B14_7	0.0845	18.5	112.975	8	34	6
B14_7	0.3555	28.3	112.413	26	34	38
B14_7	0.0848	17.1	112.678	7	34	9
B14_7	0.1596	19.4	64.1858	12	34	11
B14_7	0.1131	22	107.695	5	34	15
B14_7	0.1644	21.2	129.171	18	34	9
B14_7	0.0674	20	117.289	6	34	7
B14_7	0.005	6.2	193.022	7	34	1
B14_7	0.213	21.2	110.026	17	34	18
B14_7	0.0101	8.9	140.822	5	34	1
B14_7	0.0272	11.8	102.172	6	34	4
B14_7	0.0465	21.8	121.147	5	34	6
B14_7	0.134	15.2	106.44	9	34	8
B14_7	0.0875	18	114.614	8	34	10
B14_7	0.2457	23.9	96.4124	14	34	16
B14_7	0.2515	20	103.68	16	34	20
B14_7	0.1858	23.3	116.202	25	34	23
B14_7	0.2936	26	100.857	32	34	26
B14_7	0.0845	17	104.354	7	34	7
B14_7	0.1958	22	106.746	18	34	15
B14_7	0.0287	22.6	12.8732	17	34	19
B14_7	0.313	23.4	100.229	25	34	20
B14_7	0.2265	21.2	150.269	18	34	18
B14_7	0.3034	22.6	100.693	23	34	7
B14_7	0.0148	7	813.192	7	34	2
B14_7	0.0335	13.3	113.461	8	34	3
B14_7	0.03	14.5	113.138	5	34	3
B14_7	0.1855	19	108.844	8	34	9
B14_7	0.0458	15	125.399	6	34	5
B14_7	0.0467	14	126.078	16	34	7
BP15_10	0.1013	15.5	131.469	8	14	11
BP15_10	0.1968	23.3	114.981	15	14	12
BP15_10	0.0648	12.3	123.279	7	14	4
BP15_10	0.1713	22.2	98.1283	12	14	11
BP15_10	0.1254	26.5	114.924	8	14	13
BP15_10	0.2573	23.8	118.687	21	14	21
BP15_10	0.0759	12.2	114.401	8	14	7
BP15_10	0.2553	20.7	123.097	24	14	21
BP15_10	0.2327	20.6	117.525	12	14	13
BP15_10	0.3674	24	141.172	23	14	24
BP15_10	0.3971	22.5	105.327	23	14	22
BP15_10	0.0232	13.5	141.077	4	14	4
BP15_10	0.1901	21	108.916	10	14	11
BP15_10	0.3077	24.5	89.964	28	14	22
B27_11		17.4			33	6
B27_11	0.0128	21	126.864	8	33	11
B27_11	0.0245	18.5	108.98	11	33	12
B27_11	0.0063	14.5	108.995	3	33	6
B27_11	0.0259	20.3	99.5359	4	33	11
B27_11	0.0222	23	108.855	12	33	16
B27_11	0.0159	19	96.3309	10	33	17
B27_11	0.0059	20.3	98.7146	5	33	13
B27_11	0.0017	14	104.912	3	33	4
B27_11	0.0328	21.7		1	33	12
B27_11	0.0175	17.7	88.7053	3	33	9
B27_11		16			33
B27_11		20			33	12
B27_11		19.5			33	9
B27_11	0.0005	17	81.55	1	33	6
B27_11		21.3			33	4
B27_11		20.8			33	4
B27_11	0.0056	15.8	12.2358	2	33	5
B27_11		19			33	9
B27_11	0.0442	29.5	94.5846	12	33	25
B27_11	0.0358	19	103.158	5	33	12
B27_11	0.0493	28	99.9914	13	33	17
B27_11		14			33	4
B27_11	0.0122	14.3	107.752	5	33	5
B27_11		25.3			33	3
B27_11	0.0237	18	110.412	4	33	8
B27_11	0.0023	11.4	127.516	2	33	4
B27_11	0.0083	17.2		3	33	9
B27_11	0.0154	19		4	33	5
B27_11	0.007	13	109.589	4	33	5
B27_11	0.0053	21	11.761	1	33	6
B27_11		14.7			33	4
B27_11	0.0122	13.2	102.188	4	33	6
B28_10	0.0506	24	60.0073	6	39	12
B28_10	0.0216	14.5	62.3013	6	39	7
B28_10	0.0048	13	89.6948	1	39	4
B28_10		16			39	2
B28_10		20.6			39	1
B28_10		16.2			39	1
B28_10	0.0027	18	18.9415	1	39	8
B28_10		12		1	39	3
B28_10	0.0016	21.5	32.9663	3	39	7
B28_10		19			39	9
B28_10		15.5			39	3
B28_10	0.1696	36.5	52.5393	13	39	18
B28_10	0.0069	14	122.737	4	39	4
B28_10	0.0264	22.5	98.4363	7	39	18
B28_10	0.0302	18	88.3763	5	39	10
B28_10	0.0063	19	79.664	3	39	8
B28_10	0.0097	15.7	40.821	5	39	10
B28_10	0.0251	21	99.1145	9	39	21
B28_10	0.0077	13.5	123.747	4	39	7
B28_10	0.0125	17.5	105.79	4	39	14
B28_10	0.0202	17.5	120.095	7	39	21
B28_10	0.0316	19.5	135.198	15	39	17
B28_10	0.0152	9	80.5511	6	39	5
B28_10	0.0241	12.7	122.202	6	39	5
B28_10	0.0034	18		2	39	10
B28_10	0.0021	20	49.2167	2	39	8
B28_10		16			39	5
B28_10	0.002	12.5		1	39	2
B28_10		12.3			39	2
B28_10		14			39	1
B28_10	0.0143	16		2	39	10
B28_10	0.0083	16.4		6	39	8
B28_10		13			39	3
B28_10	0.0147	16.6	55.1162	5	39	11
B28_10	0.0355	18	78.8325	7	39	9
B28_10	0.0347	13.5	77.843	10	39	9
B28_10	0.0623	24	60.4616	9	39	12
B28_10	0.0138	24	66.0914	4	39	11
B28_10	0.0196	14	91.7007	6	39	9
B7_13	0.0487	17.8	89.567	5	30	8
B7_13	0.0359	9	80.3527	7	30	5
B7_13	0.1362	22.2	72.3915	8	30	17
B7_13	0.0843	16	89.8901	19	30	14
B7_13	0.1884	21.2	87.3559	21	30	22
B7_13	0.0828	17.5	98.5906	15	30	12
B7_13	0.065	19.8	79.9565	7	30	14
B7_13	0.1233	17.5	64.7384	23	30	15
B7_13	0.0604	24.3	64.5812	13	30	14
B7_13	0.0476	17.7	84.2427	7	30	3
B7_13	0.0658	18	81.9952	8	30	7
B7_13	0.028	11	84.9503	6	30	11
B7_13	0.0679	15.2	89.0026	7	30	8
B7_13	0.0275	9.5	81.2779	7	30	1
B7_13	0.0383	8.5	78.6945	7	30	5
B7_13	0.0256	17.5	62.6267	13	30	7
B7_13	0.0246	7.9	91.1573	5	30	2
B7_13	0.024	16	73.2541	6	30	4
B7_13	0.034	14.3	78.3627	6	30	5
B7_13	0.0398	16.7	67.497	6	30	8
B7_13	0.0283	14.2	67.7016	5	30	9
B7_13	0.0325	13.3	110.73	13	30	5
B7_13	0.0483	13.5	17.5417	6	30	10
B7_13	0.065	13.8	87.0245	8	30	8
B7_13	0.0302	14.2	110.232	5	30	11
B7_13	0.034	15.2	76.0428	6	30	12
B7_13	0.0581	19.5	79.3679	7	30	12
B7_13	0.0394	9.5	93.903	8	30	4
B7_13	0.0589	11.5	96.4374	6	30	7
B7_13	0.0354	17.2	80.6255	7	30	7
B8_15	0.0514	12	104.826	6	21	9
B8_15	0.0322	15	108.436	5	21	11
B8_15	0.1043	19.4	109.746	15	21	14
B8_15	0.0719	18.5	106.201	7	21	16
B8_15	0.0326	15	114.426	5	21	8
B8_15	0.0101	13.8	109.893	5	21	2
B8_15	0.0228	8.2	75.9353	5	21	4
B8_15	0.1176	17.4	83.5876	8	21	17
B8_15	0.0144	14.3	98.8507	3	21	7
B8_15	0.0894	18.8	105.042	9	21	17
B8_15	0.0226	8.8	123.01	7	21	4
B8_15	0.06	14	85.2644	7	21	7
B8_15	0.0715	16	100.377	7	21	13
B8_15	0.0382	15.6	103.069	6	21	6
B8_15	0.0845	17.8	110.834	7	21	12
B8_15	0.0288	12.3	97.6568	4	21	5
B8_15	0.0195	13.3	92.941	5	21	9
B8_15	0.0203	11	106.458	4	21	6
B8_15	0.0156	9.2	78.9922	5	21	2
B8_15	0.007	7	76.1184	5	21	2
B8_15	0.0355	8.2	106.144	7	21	6
B913	0.117	22	95.2453	17	49	21
B913	0.1042	19.6	124.275	10	49	11
B913	0.1919	24	98.865	19	49	22
B913	0.3042	26.4	85.4539	33	49	39
B913	0.0491	18.5	93.4514	9	49	9
B913	0.1488	21.4	94.8429	17	49	17
B913	0.1975	22	102.287	21	49	28
B913		24			49	3
B913	0.0306	17.6	78.7848	5	49	11
B913	0.0125	15	120.146	4	49	11
B913	0.1693	31.6	64.0272	19	49	38
B913	0.2459	25	101.624	21	49	31
B913	0.0618	18.7	92.5484	6	49	16
B913	0.0826	20.3	70.0589	6	49	18
B913	0.0284	25	75.0516	9	49	22
B913	0.2853	33.2	80.3418	29	49	41
B913	0.0442	10.8	81.7713	6	49	6
B913	0.0322	12.5	94.8481	6	49	10
B913	0.0444	10.4	102.049	7	49	4
B913	0.0693	22.6	72.6855	13	49	24
B913	0.074	29.6	86.5965	17	49	25
B913	0.0376	15.6	70.8432	10	49	13
B913	0.0506	24	85.8434	8	49	13
B913	0.1258	20.3	101.08	15	49	19
B913	0.0377	8.5	98.2173	5	49	6
B913	0.2475	24.3	105.172	27	49	35
B913	0.0806	18	104.765	13	49	15
B913	0.0586	10.7	98.3917	7	49	8
B913	0.0463	21	101.267	10	49	21
B913	0.0569	18	92.991	6	49	12
B913	0.0928	18.6	95.7992	13	49	18
B913	0.0474	13.3	92.6631	6	49	11
B913	0.1616	21.2	139.832	12	49	21
B913	0.0633	18.2	103.416	7	49	6
B913	0.2142	22.6	89.5594	19	49	28
B913	0.0456	16.8	100.447	6	49	9
B913	0.0243	16.7	102.284	5	49	8
B913	0.0245	15.7	111.233	6	49	6
B913	0.0492	14.5	81.3435	6	49	10
B913	0.0458	11.8	96.3277	8	49	6
B913	0.0458	14	76.0694	6	49	10
B913	0.012	9	88.2882	3	49	3
B913	0.022	6	99.5321	6	49	1
B913	0.0228	16.7	77.8618	4	49	5
B913	0.0311	13.5	86.9524	4	49	9
B913	0.0345	15.3	77.7897	2	49	6
B913	0.1932	28	72.1495	18	49	26
B913	0.0117	8.3	129.366	4	49	2
B913	0.0788	18	107.437	8	49	12
B10_9	0.0605	18.5	114.281	8	46	4
B10_9	0.0383	16.2	137.049	6	46	3
B10_9	0.0285	15	135.63	6	46	1
B10_9	0.0353	17	142.498	7	46	2
B10_9	0.0152	9.6	138.986	5	46	1
B10_9	0.0466	18.5	128.893	6	46	4
B10_9	0.0238	13.8	130.272	6	46	1
B10_9	0.0153	11.6	127.033	5	46	1
B10_9	0.0103	13.5	145.447	5	46	1
B10_9	0.0105	14	129.666	4	46
B10_9	0.0094	9.6	146.138	6	46
B10_9	0.0485	21.2	136.482	6	46	4
B10_9	0.004	20.4	73.8337	2	46	2
B10_9	0.0087	11.5	147.233	5	46
B10_9	0.0134	9	111.983	6	46
B10_9	0.0063	9.2	172.428	4	46	1
B10_9	0.0304	17.5	118.096	6	46	3
B10_9	0.0411	16	114.578	7	46	1
B10_9	0.0292	12.7	136.026	5	46	7
B10_9	0.0479	16	120.409	6	46	2
B10_9	0.046	15.9	151.871	7	46	2
B10_9	0.0342	16.9	133.806	6	46	4
B10_9	0.1033	15	105.462	7	46	9
B10_9	0.0723	11.8	152.336	8	46	6
B10_9	0.0506	21.2	135.307	6	46	3
B10_9	0.037	18.5	144.038	7	46	2
B10_9	0.0453	15.3	142.78	7	46	4
B10_9	0.1057	24.5	134.76	9	46	5
B10_9	0.0643	19.5	126.858	8	46	4
B10_9	0.1107	22	123.918	11	46	5
B10_9	0.0949	18.8	118.129	9	46	5
B10_9	0.0693	17.7	129.553	8	46	5
B10_9	0.0701	15.6	128.842	7	46	6
B10_9	0.0545	22.5	123.718	6	46	1
B10_9	0.1094	21	120.344	13	46	5
B10_9	0.115	21.3	124.304	8	46	5
B10_9	0.0662	19.3	167.683	13	46	8
B10_9	0.0522	19.1	137.034	6	46	5
B10_9	0.102	19.3	131.669	9	46	6
B10_9	0.0683	19.8	92.4588	6	46	5
B10_9	0.1263	20	107.293	8	46	7
B10_9	0.0576	21.8	125.933	7	46	4
B10_9	0.1324	19	124.011	9	46	5
B10_9	0.0808	18.8	131.876	8	46	5
B10_9	0.029	18.5	137.766	6	46	1
B10_9	0.0208	14.2	147.024	5	46
BP11_11	0.0707	17.5	173.139	6	27	4
BP11_11	0.0091	11.2	116.739	7	27
BP11_11	0.02	9.5	127.313	6	27	1
BP11_11	0.1148	20.8	119.896	11	27	8
BP11_11	0.1335	17.2	121.761	16	27	8
BP11_11	0.0448	11.6	141.358	6	27	5
BP11_11	0.1679	18.5	131.681	9	27	7
BP11_11	0.1163	19.1	125.648	8	27	5
BP11_11	0.0326	10.5	161.788	6	27	3
BP11_11	0.2156	21.5	136.721	17	27	12
BP11_11	0.2384	24.6	14.5525	25	27	14
BP11_11	0.008	15.8	832.499	4	27	1
BP11_11	0.0812	17.3	53.4649	7	27	5
BP11_11	0.0258	19.2	210.874	5	27
BP11_11	0.1586	19.6	24.9704	18	27	8
BP11_11	0.3959	25.2	37.0633	30	27	21
BP11_11	0.2694	23.8	55.8905	16	27	11
BP11_11	0.0024	1	2123.26	3	27	3
BP11_11	0.0043	9	1067.68	4	27	1
BP11_11	0.0046	1.5	2116.31	5	27	1
BP11_11	0.0205	7	57.469	5	27	2
BP11_11	0.0941	15	141.693	10	27	4
BP11_11	0.012	10	397.694	6	27	2
BP11_11	0.0143	9.2	1195.2	5	27	7
BP11_11	0.0412	14.6	13.2037	8	27	9
BP11_11	0.1036	15.6	21.1381	7	27	7
BP11_11	0.1864	16	10.7719	16	27	9
BP12_13	0.0666	22.2	104.074	7	67	2
BP12_13	0.0383	19.5	138.358	5	67	4
BP12_13	0.0959	19.3	138.71	9	67	4
BP12_13	0.0803	17	126.65	9	67	5
BP12_13	0.035	15.7	144.015	5	67	5
BP12_13	0.1118	20.6	131.444	14	67	4
BP12_13	0.0625	16.1	137.221	8	67	7
BP12_13	0.0292	19.4	160.365	4	67	3
BP12_13	0.1188	20.5	118.007	12	67	4
BP12_13	0.0926	22.3	122.883	8	67	8
BP12_13	0.1899	23.8	122.041	16	67	6
BP12_13	0.1083	19	149.038	11	67	2
BP12_13	0.2006	26.8	132.862	21	67	8
BP12_13	0.0304	15.2	122.161	4	67	10
BP12_13	0.0339	14	150.786	6	67	3
BP12_13	0.0323	12	142.664	6	67	3
BP12_13	0.0288	16.9	106.948	5	67	2
BP12_13	0.0224	12.2	111.367	5	67	4
BP12_13	0.0483	13.2	133.516	6	67	3
BP12_13	0.0325	11.1	128.357	8	67	4
BP12_13	0.0295	9.5	131.296	6	67	3
BP12_13	0.0345	13.3	97.5883	6	67	4
BP12_13	0.0624	16	127.764	8	67	3
BP12_13	0.0345	12.4	104.967	5	67	4
BP12_13	0.0387	14.7	117.072	7	67	3
BP12_13	0.021	10.3	119.678	4	67	4
BP12_13	0.0135	10.2	99.0884	4	67	2
BP12_13	0.0092	6.1	127.033	3	67
BP12_13	0.0061	8.6	16.8074	3	67	1
BP12_13	0.0123	16	142.257	4	67
BP12_13	0.0174	7.2	138.862	7	67	2
BP12_13	0.0237	12.4	138.929	5	67
BP12_13	0.0114	6.6	131.658	4	67	3
BP12_13	0.0635	15.8	135.921	8	67	5
BP12_13	0.0235	10.5	126.244	5	67	1
BP12_13	0.0541	13.7	115.345	8	67	1
BP12_13	0.0282	13.8	126.344	4	67	3
BP12_13	0.0483	18.5	128.494	5	67	7
BP12_13	0.0045	9.5	140.36	3	67	6
BP12_13	0.0077	6.5	137.169	4	67
BP12_13	0.0131	14	145.426	5	67
BP12_13	0.0242	17.8	133.96	5	67	1
BP12_13	0.0304	9.2	111.845	5	67	4
BP12_13	0.0089	7	129.133	3	67	3
BP12_13	0.0774	17	131.243	8	67	4
BP12_13	0.0305	12.8	125.699	5	67
BP12_13	0.0149	11.5	139.746	4	67	3
BP12_13	0.0063	6.7	132.334	4	67	1
BP12_13	0.0067	8.3	123.864	3	67
BP12_13	0.0438	12.9	134.37	6	67
BP12_13	0.0577	12.3	94.7547	6	67	2
BP12_13	0.0216	8	147.552	6	67	3
BP12_13	0.0343	10.6	128.896	6	67	1
BP12_13	0.0218	14	121.636	6	67	3
BP12_13	0.0637	17.5	88.1961	5	67	3
BP12_13	0.0505	16	96.0943	7	67	5
BP12_13	0.046	18.8	122.173	6	67	4
BP12_13	0.0375	13.9	130.18	7	67	4
BP12_13	0.0376	19.6	136.71	7	67	3
BP12_13	0.0873	28	123.954	27	67	5
BP12_13	0.3614	18.4	134.081	7	67	15
BP12_13	0.0713	15.5	116.697	7	67	5
BP12_13	0.0703	22	134.338	8	67	3
BP12_13	0.1133	9.6	109.784	5	67	6
BP12_13	0.0526	15.8	106.866	6	67	3
BP12_13	0.0566	17.5	122.335	7	67	5
BP12_13	0.0699	16	126.91	7	67	5
BP13_5	0.0867	13.3	128.48	7	10	5
BP13_5	0.022	9	134.408	5	10	1
BP13_5	0.1242	19.1	116.478	10	10	5
BP13_5	0.1347	19.8	127.012	12	10	6
BP13_5	0.116	15	133.526	8	10	4
BP13_5	0.181	21	106.919	17	10	8
BP13_5	0.0689	15.5	138.017	7	10	5
BP13_5	0.0083	5.6	112.095	4	10	1
BP13_5	0.0116	6	164.47	5	10	1
BP13_5	0.0339	10.8	113.692	4	10	4
BP21_13	0.0523	13.8	102.602	7	21	6
BP21_13	0.0396	9.5	135.43	7	21	6
BP21_13	0.1316	17	94.6206	10	21	9
BP21_13	0.1191	18.3	117.268	27	21	13
BP21_13	0.067	16	121.799	8	21	9
BP21_13	0.1335	16	113.873	9	21	10
BP21_13	0.0411	12	132.929	6	21	4
BP21_13	0.0273	13	89.2608	4	21	3
BP21_13	0.0229	8.5	137.595	6	21	2
BP21_13	0.0195	9.8	143.945	5	21	2
BP21_13	0.0403	11.5	110.266	6	21	3
BP21_13	0.0581	18	119.448	10	21	9
BP21_13	0.042	13	110.512	7	21	6
BP21_13	0.0774	12.8	129.407	9	21	5
BP21_13	0.0344	16	110.665	5	21	4
BP21_13	0.0487	18.2	130.325	6	21	6
BP21_13	0.039	13.5	128.837	4	21	4
BP21_13	0.0392	12.1	110.566	6	21	4
BP21_13	0.0495	12.3	115.802	6	21	8
BP21_13	0.0945	18	116.063	9	21	10
BP21_13	0.0288	10.6	126.243	5	21	2
BP22_14	0.0538	9.9	118.711	7	13	4
BP22_14	0.2151	24.3	100.323	21	13	12
BP22_14	0.1911	18.7	101.82	12	13	15
BP22_14	0.0289	13	126.268	7	13	3
BP22_14	0.0442	11	108.213	5	13	4
BP22_14	0.1611	15	100.291	9	13	10
BP22_14	0.1893	19	93.1933	14	13	19
BP22_14	0.0874	18.1	114.391	7	13	11
BP22_14	0.1025	21.5	102.361	10	13	8
BP22_14	0.0326	13.2	119.084	7	13	1
BP22_14	0.0323	16	109.288	5	13	5
BP22_14	0.0325	13.2	131.163	5	13	7
BP22_14	0.1172	20.1	124.037	14	13	12
BP23_16	0.1541	22.2	29.2643	13	15	18
BP23_16	0.1006	12.2	109.068	8	15	13
BP23_16	0.031	12.3	95.5389	6	15	4
BP23_16	0.0847	23.3	102.615	10	15	10
BP23_16	0.0296	19	107.639	5	15	7
BP23_16	0.0505	16	111.661	6	15	7
BP23_16	0.0083	12.7	108.929	4	15	2
BP23_16	0.0482	22	92.8032	7	15	12
BP23_16	0.1253	20	89.8781	9	15	15
BP23_16	0.2611	29.5	119.239	21	15	26
BP23_16	0.0976	18	96.5706	8	15	9
BP23_16	0.249	24.2	108.514	19	15	19
BP23_16	0.031	17	117.331	4	15	7
BP23_16	0.0172	7.8	133.107	6	15	2
BP23_16	0.1895	25.5	101.564	16	15	25
BP24_6	0.1163	19	100.921	8	26	9
BP24_6	0.0346	21	104.499	7	26	9
BP24_6	0.073	14.2	109.277	13	26	8
BP24_6	0.0758	19	109.462	6	26	13
BP24_6	0.115	18	96.3239	8	26	4
BP24_6	0.0317	13.7	116.227	9	26	6
BP24_6	0.0287	17.6	120.471	5	26	7
BP24_6	0.1048	20	107.946	8	26	7
BP24_6	0.0786	16.5	112.096	8	26	8
BP24_6	0.1005	15.5	102.636	8	26	6
BP24_6	0.0659	11.2	98.9825	7	26	7
BP24_6	0.0242	17.5	102.105	4	26	3
BP24_6	0.082	17.2	116.153	10	26	15
BP24_6	0.183	18	93.3655	9	26	11
BP24_6	0.1176	22.5	98.2631	8	26	10
BP24_6	0.1823	17.5	92.93	13	26	13
BP24_6	0.0133	11.2	96.9261	4	26	2
BP24_6	0.1575	21	85.2537	13	26	16
BP24_6	0.0568	21	97.8955	6	26	5
BP24_6	0.0293	11	91.2586	5	26	4
BP24_6	0.0366	16.3	103.686	5	26	4
BP24_6	0.0238	8.9	99.0987	6	26	1
BP24_6	0.0336	18	98.3715	5	26	6
BP24_6	0.0161	11.5	117.782	4	26	4
BP24_6	0.1183	18	109.331	7	26	10
BP24_6	0.0324	10	122.023	5	26	5
BP25_9	0.0238	13.7	98.1682	5	9	5
BP25_9	0.1005	15	109.274	8	9	9
BP25_9	0.185	16.8	103.93	13	9	12
BP25_9	0.0397	8	121.926	8	9	3
BP25_9	0.0264	10.2	129.091	5	9	5
BP25_9	0.0236	14.1	98.4315	4	9	6
BP25_9	0.1403	16.6	103.232	13	9	16
BP25_9	0.1489	25.5	91.7202	16	9	20
BP25_9	0.1657	17	103.648	10	9	14
BP26_9	0.1428	26.1	110.704	17	41	15
BP26_9	0.0549	13.9	104.235	6	41	4
BP26_9	0.0589	15	132.304	7	41	4
BP26_9	0.0915	25.4	120.52	19	41	13
BP26_9	0.0375	15.4	111.235	6	41	6
BP26_9	0.0629	19.2	104.528	7	41	13
BP26_9	0.1171	23.2	102.975	7	41	11
BP26_9	0.1457	20.3	115.553	14	41	17
BP26_9	0.3152	30.1	91.1155	27	41	20
BP26_9	0.2844	26	110.071	30	41	18
BP26_9	0.2505	29.4	99.559	23	41	22
BP26_9	0.1824	19.2	106.74	19	41	18
BP26_9	0.1567	28.7	104.816	20	41	15
BP26_9	0.152	25	107.788	13	41	14
BP26_9	0.1152	21.3	114.776	8	41	9
BP26_9	0.0853	22	100.404	10	41	12
BP26_9	0.2198	24.7	100.635	11	41	17
BP26_9	0.0886	21.6	99.095	10	41	15
BP26_9	0.0703	21	119.081	13	41	6
BP26_9	0.0931	24.5	123.896	6	41	11
BP26_9	0.1348	25.5	98.2018	11	41	14
BP26_9	0.1159	17.3	140.345	8	41	9
BP26_9	0.0177	12.8	96.1637	4	41	1
BP26_9	0.2603	25.2	140.834	26	41	17
BP26_9	0.0541	18	101.122	6	41	3
BP26_9	0.1369	25.3	110.271	12	41	19
BP26_9	0.0258	13.8	122.247	4	41	8
BP26_9	0.2633	25.3	107.379	27	41	14
BP26_9	0.0895	20.6	118.002	9	41	12
BP26_9	0.1606	26	114.289	15	41	18
BP26_9	0.1135	25.6	99.441	15	41	12
BP26_9	0.0928	18.5	110.615	7	41	9
BP26_9	0.0807	24.5	354.117	15	41	11
BP26_9	0.0201	16.5	87.9978	6	41	2
BP26_9	0.0395	28.3	63.3589	15	41	32
BP26_9	0.0168	36.8		6	41	31
BP26_9	0.0135	14	127.443	5	41	1
BP26_9	0.0264	13.2	114.253	5	41	2
BP26_9	0.0467	16	124.935	6	41	8
BP26_9	0.08	22.8	128.966	11	41	9
BP26_9	0.0416	14	131.817	6	41	4
BP4_3	0.2287	24	87.004	19	28	4
BP4_3	0.0211	9.7	149.839	6	28	3
BP4_3	0.0086	12.2	147.077	3	28	1
BP4_3	0.0164	6.3	120.046	5	28	1
BP4_3	0.1142	18.5	17.645	8	28	5
BP4_3	0.0985	18.8	119.587	8	28	5
BP4_3	0.1072	17.4	105.615	7	28	6
BP4_3	0.0603	15.5	137.251	9	28	4
BP4_3	0.0331	14.2	134.307	5	28	1
BP4_3	0.0365	13.2	119.969	6	28	4
BP4_3	0.0458	15.1	108.112	6	28	4
BP4_3	0.2398	25	100.597	20	28	7
BP4_3	0.0944	18.2	122.112	8	28	3
BP4_3	0.0649	12.9	131.586	7	28	3
BP4_3	0.0362	14	141.995	5	28	1
BP4_3	0.0766	16.5	121.579	9	28	5
BP4_3	0.0589	9	108.424	8	28	3
BP4_3	0.1008	14.8	109.966	10	28	3
BP4_3	0.0913	17	106.805	10	28	3
BP4_3	0.0364	9.5	120.912	6	28	4
BP4_3	0.0351	14.5	116.549	7	28	2
BP4_3	0.2806	25.2	103.016	21	28	5
BP4_3	0.0996	15.8	117.162	9	28	2
BP4_3	0.1391	22.2	121.569	10	28	2
BP4_3	0.2523	25.4	114.693	20	28	9
BP4_3	0.341	22.5	95.0271	24	28	10
BP4_3	0.0736	19.2	126.245	6	28	4
BP4_3	0.2727	28.8	116.419	20	28	11
BP5_16	0.1765	24.7	104.042	16	23	10
BP5_16	0.0934	23.3	108.688	11	23	8
BP5_16	0.0636	19.7	112.476	7	23	6
BP5_16	0.134	21	114.758	9	23	7
BP5_16	0.1049	19.1	110.408	9	23	5
BP5_16	0.0455	14.7	122.972	5	23	3
BP5_16	0.0966	16.4	113.031	9	23	7
BP5_16	0.0767	16.8	111.112	8	23	5
BP5_16	0.0748	11.5	104.639	8	23	6
BP5_16	0.0468	17.2	126.492	6	23	3
BP5_16	0.0277	15.4	103.754	5	23	5
BP5_16	0.2451	22.5	96.0441	22	23	12
BP5_16	0.0463	18.8	112.673	5	23	5
BP5_16	0.0196	10.5	126.487	5	23	3
BP5_16	0.0543	17.3	112.293	7	23	2
BP5_16	0.0433	12.5	127.115	8	23	4
BP5_16	0.1787	23.2	102.678	10	23	10
BP5_16	0.1468	21.2	92.5751	14	23	6
BP5_16	0.1253	23.3	95.7639	11	23	8
BP5_16	0.1504	20	106.374	11	23	10
BP5_16	0.0922	17	112.926	9	23	5
BP5_16	0.1029	21.8	125.52	6	23	6
BP5_16	0.083	15.8	125.769	7	23	4
BP6_5	0.0786	16.8	104.274	7	27	4
BP6_5	0.01	8	134.361	4	27
BP6_5	0.0044	6	145.505	3	27	1
BP6_5	0.0775	14.5	105.715	12	27	4
BP6_5	0.0523	18	119.307	6	27	5
BP6_5	0.164	20.3	101.879	18	27	10
BP6_5	0.0718	19	99.2842	6	27	6
BP6_5	0.1015	15.2	109.994	8	27	3
BP6_5	0.0431	12.2	112.161	7	27	3
BP6_5	0.0151	6.8	146.622	6	27	1
BP6_5	0.0198	10	127.938	5	27	1
BP6_5	0.1588	20.5	114.163	13	27	9
BP6_5	0.0263	13	121.028	5	27	4
BP6_5	0.0484	15.8	133.122	5	27	4
BP6_5	0.0364	8	132.898	6	27	2
BP6_5	0.0355	14.8	122.334	5	27	4
BP6_5	0.0216	10.1	123.743	5	27	2
BP6_5	0.0296	12	127.288	5	27	3
BP6_5	0.0466	9.5	115.833	6	27	5
BP6_5	0.1169	19.5	109.579	12	27	7
BP6_5	0.0701	16.4	101.831	6	27	3
BP6_5	0.1093	19.1	98.1071	8	27	5
BP6_5	0.2063	20	91.3608	17	27	11
BP6_5	0.0782	20.4	101.511	7	27	8
BP6_5	0.0266	10.2	115.968	5	27	2
BP6_5	0.0287	7.6	103.325	5	27	3
BP6_5	0.0097	8.6	119.706	4	27
BP7_6	0.0112	13	163.057	5	31	1
BP7_6	0.0272	20.2	168.813	5	31	5
BP7_6	0.0632	16.7	136.082	6	31	8
BP7_6	0.1542	23	110.985	11	31	8
BP7_6	0.0618	15.5	119.689	7	31	6
BP7_6	0.0721	17.9	124.888	7	31	5
BP7_6	0.0545	16.2	122.067	8	31	3
BP7_6	0.0761	17.1	104.59	7	31	4
BP7_6	0.2433	26.7	88.1495	20	31	14
BP7_6	0.0232	17.5	112.309	4	31	2
BP7_6	0.0298	16.2	145.755	6	31	3
BP7_6	0.044	18.6	117.561	6	31	5
BP7_6	0.2758	30.2	101.882	18	31	14
BP7_6	0.1117	20	134.98	12	31	11
BP7_6	0.134	22.1	102.1	9	31	8
BP7_6	0.0795	22.9	132.017	10	31	6
BP7_6	0.0729	22.1	110.436	6	31	5
BP7_6	0.0812	17.3	121.626	10	31	6
BP7_6	0.1071	17.5	121.21	16	31	5
BP7_6	0.0622	16.8	126.402	7	31	8
BP7_6	0.0904	18.8	140.419	10	31	6
BP7_6	0.032	17.5	151.98	6	31	1
BP7_6	0.0331	14.9	85.1792	5	31	1
BP7_6	0.0902	20.2	105.685	7	31	8
BP7_6	0.0792	17	130.015	9	31	5
BP7_6	0.034	13	126.463	79	31	2
BP7_6	0.0618	16.2	122.329	7	31	3
BP7_6	0.0908	10.1	114.309	7	31	4
BP7_6	0.0142	7.1	136.8	4	31	1
BP7_6	0.1958	30.7	107.402	16	31	11
BP7_6	0.0481	15.7	133.008	6	31	3
BP8_14	0.1223	18.8	101.097	13	19	9
BP8_14	0.093	16.1	126.284	8	19	4
BP8_14	0.0592	10	138.68	8	19	3
BP8_14	0.0662	17.5	128.858	7	19	3
BP8_14	0.1071	18.8	134.449	9	19	4
BP8_14	0.0268	10.7	144.078	8	19	2
BP8_14	0.0116	8.2	168.607	5	19
BP8_14	0.0198	9.6	142.858	6	19	1
BP8_14	0.057	11.5	123.475	8	19	3
BP8_14	0.0563	11.4	139.312	7	19	3
BP8_14	0.028	9	144.611	6	19	2
BP8_14	0.2402	16.4	105.326	20	19	10
BP8_14	0.0216	12.6	128.877	5	19	1
BP8_14	0.0174	15	141.702	5	19	1
BP8_14	0.006	11.3	138.275	4	19
BP8_14	0.0049	5.3	142.258	3	19
BP8_14	0.0762	12	139.815	9	19	6
BP8_14	0.0321	12.2	138.754	7	19	3
BP8_14	0.0446	15.6	140.325	6	19	3
BP9_6	0.0251	8	126.859	6	32	2
BP9_6	0.0348	12.5	132.23	6	32	2
BP9_6	0.0264	13.8	115.515	5	32	1
BP9_6	0.0559	14.8	99.2122	5	32	2
BP9_6	0.0397	16.6	119.1	4	32	3
BP9_6	0.0343	9.8	117.523	6	32	1
BP9_6	0.0303	17.2	124.559	4	32	3
BP9_6	0.0523	15.4	123.551	6	32	4
BP9_6	0.1383	22	103.231	13	32	6
BP9_6	0.0941	17.6	114.991	8	32	8
BP9_6	0.0511	13	133.008	7	32	3
BP9_6	0.0297	12.1	127.186	6	32	1
BP9_6	0.0581	21.2	127.541	5	32	5
BP9_6	0.1205	22	106.79	11	32	8
BP9_6	0.242	27	121.976	21	32	12
BP9_6	0.176	24	141.91	13	32	6
BP9_6	0.2158	25.2	106.154	20	32	10
BP9_6	0.1423	25	95.2965	7	32	7
BP9_6	0.121	21	128.544	9	32	7
BP9_6	0.1463	30.5	117.834	20	32	11
BP9_6	0.3026	29.7	100.328	25	32	17
BP9_6	0.0508	19.1	91.4063	5	32	5
BP9_6	0.0245	11	127.694	6	32	2
BP9_6	0.1387	24.1	89.2077	11	32	6
BP9_6	0.0817	12.2	118.264	7	32	2
BP9_6	0.2285	23.6	95.3204	19	32	9
BP9_6	0.0241	9.6	147.209	6	32	3
BP9_6	0.0125	18.1	129.119	3	32	1
BP9_6	0.0138	7	157.141	5	32	1
BP9_6	0.0117	6.8	127.326	5	32	1
BP9_6	0.0123	10	103.325	5	32	1
BP9_6	0.023	19.6	135.002	4	32	4
LP12_14	0.0062	4.7	96.71	4	17
LP12_14	0.0454	14.2	56.8461	12	17	2
LP12_14	0.0402	11.5	67.3394	3	17	2
LP12_14	0.0223	10.5	57.4662	4	17	6
LP12_14	0.0576	11.3	71.5369	5	17	5
LP12_14	0.0827	13.5	69.593	11	17	6
LP12_14	0.0549	12.3	55.7005	7	17	6
LP12_14	0.0493	14.5	84.1279	6	17	5
LP12_14	0.1078	14.1	69.5377	12	17	10
LP12_14	0.0146	5.7	58.4628	5	17	1
LP12_14	0.0256	11	85.8325	5	17	5
LP12_14	0.0258	7.3	76.2007	5	17	4
LP12_14	0.0057	5	61.2663	1	17	1
LP12_14	0.0237	9.5	68.3899	4	17	3
LP12_14	0.0214	12.3	65.066	8	17	1
LP12_14	0.0249	11.2	54.3176	6	17	4
LP12_14	0.0262	8	54.53	4	17	5
LP13_4	0.0101	7.2	55.37	3	19	1
LP13_13	0.1366	28.2		5	17	17
LP13_4	0.0199	9.7	77.9331	4	19	3
LP13_13	0.0461	24	95.5758	7	17	16
LP13_4	0.0291	11.8	50.9268	4	19	4
LP13_13	0.0121	23.2	107.065	7	17	16
LP13_4	0.0122	6.5	72.955	4	19	1
LP13_13	0.1796	26.1	90.4973	7	17	21
LP13_4	0.0547	14.6	66.1313	10	19	6
LP13_13	0.1071	29.2	70.1331	11	17	19
LP13_4	0.084	14.5	65.3448	20	19	8
LP13_13	0.2244	34.7	95.4281	8	17	23
LP13_4	0.0853	17	20.345	11	19	12
LP13_13	0.0176	36.6	78.9508	2	17	24
LP13_4	0.1095	14.8	77.1977	15	19	15
LP13_13	0.2033	33.7	88.5446	7	17	16
LP13_4		8.2		5	19	5
LP13_13	0.0269	40.9	75.1407	3	17	22
LP13_4	0.0305	11.5	50.4009	7	19	9
LP13_4	0.0395	18	71.8864	7	19	14
LP13_4	0.0171	6	67.5896	4	19	1
LP13_13	0.0366	25	87.2101	4	17	14
LP13_4	0.0096	7.8	53.5244	3	19	1
LP13_13	0.019	14.5	91.2132	4	17	8
LP13_4	0.0263	8.5	59.5711	3	19	1
LP13_13	0.0054	29.7	50.8806	3	17	10
LP13_4	0.006	9.2	63.3009	2	19	4
LP13_13	0.0219	23	101.966	4	17	11
LP13_4	0.006	5.5	49.768	3	19	1
LP13_13	0.0106	20.8	71.0815	2	17	13
LP13_4	0.0042	4.6	71.603	5	19
LP13_13	0.0239	18.2	94.0563	4	17	5
LP13_4	0.0039	5.5	56.1917	3	19
LP13_13	0.0173	18.2	80.9174	5	17	9
LP13_4	0.0068	5.2	74.7189	4	19
LP13_13	0.0301	17.8	87.7714	7	17	15
LP16_1	0.0536	17.2	108.611	6	25	15
LP16_1	0.0119	12.7	101.673	4	25	8
LP16_1	0.0302	17.3	114.049	6	25	5
LP16_1	0.0087	15	113.602	3	25	6
LP16_1	0.0435	13	117.253	6	25	10
LP16_1	0.0172	14.4	75.0167	6	25	3
LP16_1	0.0216	21.8	106.353	4	25	14
LP16_1	0.0117	10	125.722	4	25	3
LP16_1	0.0116	19.5	107.103	4	25	6
LP16_1	0.018	12	113.873	5	25	6
LP16_1	0.0249	9.5	77.2108	5	25	7
LP16_1	0.0868	18.5	100.668	6	25	14
LP16_1		29			25	8
LP16_1		23		1	25	5
LP16_1		22			25	9
LP16_1		17.5			25	7
LP16_1		21			25	7
LP16_1		14.3			25	3
LP16_1	0.0383	20.9	109.027	10	25	12
LP16_1	0.0052	12.3	131.63	3	25	8
LP16_1	0.0419	16.4	100.129	6	25	12
LP16_1	0.0389	18.8	89.4582	6	25	9
LP16_1	0.0242	14	113.105	5	25	9
LP16_1	0.0102	14.2	88.318	3	25	5
LP16_1	0.0434	16.8	120.247	6	25	13
LP17_8	0.1074	25	90.2099	19	21	23
LP17_8	0.0708	17.5	75.6303	8	21	6
LP17_8	0.0754	18.5	65.3728	9	21	13
LP17_8	0.0919	17	78.1983	9	21	7
LP17_8	0.0568	13.2	87.5271	6	21	10
LP17_8	0.0478	13.5	90.4308	7	21	5
LP17_8	0.1168	17	74.1875	11	21	13
LP17_8	0.0937	22	73.437	7	21	16
LP17_8	0.1326	26	90.3698	17	21	23
LP17_8	0.1975	28.2	72.6732	20	21	24
LP17_8	0.1885	25.2	100.299	27	21	30
LP17_8	0.0866	24	83.7524	9	21	13
LP17_8	0.079	22.3	87.455	9	21	9
LP17_8	0.1394	22	74.1474	12	21	11
LP17_8	0.0959	21.5	70.6348	10	21	13
LP17_8	0.0864	21	167.244	8	21	15
LP17_8	0.3517	32.2	72.8071	35	21	33
LP17_8	0.1754	20.2	77.9667	16	21	13
LP17_8	0.1028	18.5	77.2107	17	21	12
LP17_8	0.0547	16.2	99.9	12	21	2
LP17_8	0.2244	23	71.7592	22	21	18
LP18_8	0.0114	5	72.7314	3	27	1
LP18_8	0.0835	12.4	57.1922	12	27	10
LP18_8	0.0732	12.8	74.3591	11	27	8
LP18_8	0.0577	12.6	78.6578	8	27	6
LP18_8	0.1013	14.4	67.244	13	27	8
LP18_8	0.0128	19.8	97.3832	12	27	2
LP18_8	0.1473	21	67.987	28	27	21
LP18_8	0.1747	23.4	77.0327	18	27	17
LP18_8	0.0623	15	88.3034	7	27	5
LP18_8	0.1758	28.6	62.0547	20	27	24
LP18_8	0.0197	26.5	41.0154	5	27	12
LP18_8	0.0185	10	57.7825	3	27	5
LP18_8	0.1468	21.5	76.1624	19	27	18
LP18_8	0.1152	15	83.5886	9	27	12
LP18_8	0.0996	18.1	84.8915	24	27	14
LP18_8	0.0222	12	101.441	6	27	5
LP18_8	0.0196	21.2	92.5789	9	27	6
LP18_8	0.0145	9	86.0142	5	27	2
LP18_8	0.0854	12.5	58.5131	21	27	9
LP18_8	0.0545	11.7	83.2284	7	27	6
LP18_8	0.0162	9.8	63.0087	3	27	3
LP18_8	0.0092	6.7	32.8912	3	27	4
LP18_8	0.0508	13.2	45.8939	8	27	9
LP18_8	0.0746	13.3	54.0056	12	27	5
LP18_8	0.0627	11.5	53.4865	11	27	8
LP18_8	0.0606	14	68.5062	12	27	6
LP18_8	0.0355	10	70.795	5	27	4
LP19_1	0.1348	36.5	85.0722	7	26	23
LP19_16	0.0311	17.2	90.0019	5	23	16
LP19_1	0.1637	32	63.171	9	26	17
LP19_16	0.0073	20.8	67.8971	3	23	12
LP19_1		52.5			26	29
LP19_16	0.0165	12.5	92.9691	7	23	13
LP19_1	0.0612	11.2	94.6446	7	26	13
LP19_16	0.0013	17.6	53.735	2	23	8
LP19_1	0.0642	22.6	81.9052	12	26	28
LP19_16	0.0079	17	101.506	4	23	13
LP19_1	0.0834	23	58.698	12	26	22
LP19_16	0.0073	14.5	106.967	3	23	7
LP19_1	0.0359	25	78.9049	7	26	19
LP19_16		16			23	4
LP19_1	0.1654	37	52.6849	17	26	34
LP19_16		16.8			23	16
LP19_1		25			26	7
LP19_16	0.0672	23.2	79.1817	10	23	19
LP19_1		16.7			26	1
LP19_16	0.0575	18.6	69.8463	7	23	10
LP19_1		24			26	6
LP19_16	0.0151	13.6	88.5378	4	23	8
LP19_1	0.0221	21.3	41.7891	5	26	9
LP19_16	0.0363	19.5	101.132	6	23	13
LP19_1	0.1673	25.2	99.9889	21	26	18
LP19_16	0.0071	11.5	118.37	3	23	7
LP19_1	0.043	23.2	95.9372	5	26	12
LP19_16	0.0093	15.3	98.5121	3	23	11
LP19_1	0.0369	27.7	105.044	11	26	24
LP19_16	0.0231	11.7	90.6461	7	23	10
LP19_1	0.0181	16	75.4719	3	26	9
LP19_16	0.0132	13.6	96.2163	5	23	4
LP19_1		23.4			26	4
LP19_1		18.5			26	7
LP19_1	0.0355	18.5	95.302	5	26	11
LP19_1	0.0144	20	85.6803	6	26	14
LP19_16	0.0191	18.2	104.818	4	23	14
LP19_1	0.1029	19	71.9004	8	26	13
LP19_16	0.0302	11.5	83.9556	5	23	10
LP19_1	0.0332	23.2	98.4876	7	26	13
LP19_16	0.0057	7.1	105.414	3	23	3
LP19_1	0.108	26	80.2343	10	26	14
LP19_16	0.013	12	101.754	4	23	8
LP19_1	0.0251	25.3	100.327	4	26	12
LP19_16	0.0162	23	71.5914	3	23	15
LP19_1		28.3			26	1
LP19_16	0.0025	15.9	110.714	3	23	9
LP19_1	0.1668	24.2	82.9798	9	26	13
LP19_16	0.0293	15.2	94.8851	6	23	8
LP2_10	0.1136	21.4	65.7282	14	44	11
LP2_10	0.0112	15.4	70.3711	3	44	4
LP2_10	0.0051	11.5	95.9828	5	44	4
LP2_10	0.0084	11.8	80.4877	4	44	2
LP2_10	0.0239	13.4	88.4837	5	44	1
LP2_10	0.0339	18	64.7805	5	44	4
LP2_10	0.0224	13.5	79.2153	4	44	4
LP2_10	0.021	13.3	82.1995	4	44	5
LP2_10	0.0175	9.7	107.195	4	44	3
LP2_10	0.0188	13	60.2623	3	44	3
LP2_10	0.0104	9	114.806	3	44	2
LP2_10	0.0463	18.3	91.528	5	44	4
LP2_10	0.0222	9.7	76.933	4	44	2
LP2_10	0.0231	10.5	69.1111	3	44	3
LP2_10	0.0122	9.5	89.2915	4	44	1
LP2_10	0.01	8.6	78.425	3	44	3
LP2_10	0.0114	15	93.7068	3	44	3
LP2_10	0.0093	12.6	78.8383	3	44	2
LP2_10	0.0123	9.5	92.2132	5	44	3
LP2_10	0.0255	19	95.3445	5	44	5
LP2_10	0.0341	14.2	79.8664	5	44	4
LP2_10	0.0291	17.2	75.2958	4	44	3
LP2_10	0.0428	13.8	71.179	5	44	2
LP2_10	0.0143	13.5	86.0597	4	44	2
LP2_10	0.0657	16	84.866	5	44	7
LP2_10	0.0581	21	70.2603	5	44	8
LP2_10	0.0133	19.4	88.0707	3	44	4
LP2_10	0.075	21	73.2138	9	44	4
LP2_10	0.057	15.6	80.5935	6	44	4
LP2_10	0.0298	11	76.9036	4	44	4
LP2_10	0.0448	20.8	86.0362	5	44	3
LP2_10	0.1266	24.2	88.1544	10	44	10
LP2_10	0.0941	20.5	5525.87	8	44	7
LP2_10	0.0601	17.8	69.853	6	44	4
LP2_10	0.0491	18.4	93.8461	10	44	6
LP2_10	0.0935	17.5	92.4064	12	44	8
LP2_10	0.054	18.3	85.7351	6	44	5
LP2_10	0.1257	19	73.2439	10	44	11
LP2_10	0.0589	23.5	91.2402	10	44	6
LP2_10	0.0209	16.2	97.9058	10	44	6
LP2_10	0.0369	17	84.3445	9	44	3
LP2_10	0.0431	18.6	68.3819	7	44	3
LP2_10	0.0258	12.1	102.302	5	44	2
LP2_10	0.0074	14.6	90.5848	3	44	5
LP20_16	0.0226	10	61.5003	6	31	5
LP20_16	0.0915	20.8	82.5325	15	31	10
LP20_16	0.0345	15	89.3169	7	31	4
LP20_16	0.1158	19.8	87.0314	33	31	17
LP20_16	0.024	20	69.7713	8	31	6
LP20_16	0.0377	19.6	82.7991	9	31	11
LP20_16	0.0289	12.7	93.2226	8	31	7
LP20_16	0.0268	15	75.9508	4	31	8
LP20_16	0.032	12	104.558	6	31	10
LP20_16	0.0295	18.6	64.2473	8	31	11
LP20_16	0.106	23.8	61.3951	15	31	34
LP20_16	0.0433	12.5	104.614	7	31	7
LP20_16	0.0418	25.3		8	31	14
LP20_16	0.1133	26.8	76.6681	15	31	24
LP20_16	0.157	28	100.298	16	31	30
LP20_16	0.0933	20.2	83.3926	16	31	16
LP20_16	0.0246	12.2		4	31	8
LP20_16	0.0162	14		5	31	5
LP20_16	0.0055	13.2	301.853	4	31	7
LP20_16	0.0428	22.6		10	31	18
LP20_16	0.0243	22.5		9	31	15
LP20_16	0.0341	16	71.4941	8	31	7
LP20_16	0.0125	11.5	90.9229	4	31	4
LP20_16	0.0228	15.1	79.337	5	31	10
LP20_16	0.0137	13.7	96.0237	4	31	6
LP20_16	0.0284	13	98.553	6	31	6
LP20_16	0.0049	17.5	79.2964	3	31	5
LP20_16	0.0746	17	86.5628	8	31	7
LP20_16	0.0597	13.2	93.2255	7	31	6
LP20_16	0.1777	20.5	82.4733	23	31	12
LP20_16	0.078	17.9	87.3383	16	31	7
LP21_15	0.1079	13.7	69.01	8	43	8
LP21_15	0.101	21.7	64.3794	17	43	15
LP21_15	0.0845	21.5	86.6335	11	43	9
LP21_15	0.097	19.5	71.0292	9	43	12
LP21_15	0.0606	17	80.4425	13	43	10
LP21_15	0.1773	24.5	68.5805	16	43	20
LP21_15	0.1561	25.5	66.6245	11	43	14
LP21_15	0.4878	39.9	73.8429	37	43	51
LP21_15	0.093	13	93.6312	16	43	10
LP21_15	0.1025	14.5	72.8624	14	43	9
LP21_15	0.1072	12.5	77.6403	10	43	9
LP21_15	0.2748	24	63.3558	40	43	27
LP21_15	0.4718	25.5	57.6467	69	43	42
LP21_15	0.0158	7.3	88.5246	5	43	4
LP21_15	0.0188	9.2	99.2015	4	43	4
LP21_15	0.0091	9.1	101.613	5	43	1
LP21_15	0.0355	9.8	71.8211	6	43	3
LP21_15	0.6125	24.6	77.4271	61	43	48
LP21_15	0.0359	16	74.6477	9	43	8
LP21_15	0.067	14.1	100.029	9	43	12
LP21_15	0.0264	12	83.6235	6	43	4
LP21_15	0.0229	13	89.7977	4	43	8
LP21_15	0.0692	17.3	87.048	22	43	16
LP21_15	0.0192	14.2	63.7094	8	43	9
LP21_15	0.0351	15.6	72.5605	8	43	5
LP21_15	0.0514	19	91.6448	12	43	11
LP21_15	0.0443	19.5	87.043	8	43	15
LP21_15	0.0948	17.5	66.6779	9	43	10
LP21_15	0.0751	24.5	68.137	13	43	11
LP21_15	0.0372	14.9	89.7265	9	43	4
LP21_15	0.0479	19	83.8891	6	43	10
LP21_15	0.047	17.8	80.6821	8	43	12
LP21_15	0.2111	27.3	61.1003	22	43	24
LP21_15	0.0911	18.5	53.3182	17	43	18
LP21_15	0.1649	24	63.1466	17	43	17
LP21_15	0.0729	21	75.3664	7	43	13
LP21_15	0.1133	19.6	75.5893	15	43	11
LP21_15	0.0568	15	116.774	7	43	5
LP21_15	0.134	17.6	66.793	8	43	13
LP21_15	0.0102	8.5	80.7565	4	43	3
LP21_15	0.1129	20	70.2249	15	43	16
LP21_15	0.0227	19.7	81.0633	4	43	7
LP21_15	0.1171	14	71.6101	8	43	11
LP22_7	0.0258	12.2	70.2062	13	26	9
LP22_16	0.098	21.5	89.7366	9	33	18
LP22_7	0.2811	22.5	62.0155	31	26	32
LP22_16		26.3			33	10
LP22_7	0.1132	19	79.3807	23	26	21
LP22_16		19			33	8
LP22_7	0.1972	24.3	91.047	45	26	31
LP22_16	0.0803	26.3	94.5628	6	33	18
LP22_7	0.0533	17	77.5654	10	26	11
LP22_16	0.0711	22.2	94.0014	7	33	9
LP22_7	0.0244	20.5	72.24	10	26	14
LP22_16	0.0119	19.8	89.1297	3	33	8
LP22_7	0.1183	19	53.5344	22	26	15
LP22_16	0.0184	15.6	100.874	5	33	5
LP22_7	0.1212	20.1	78.0275	23	26	23
LP22_16	0.0034	12.1	135.209	3	33	5
LP22_7	0.0901	17.5	77.2828	24	26	17
LP22_16	0.021	16.3	109.252	5	33	12
LP22_7	0.0863	18.1	76.4515	7	26	11
LP22_16	0.0044	11	101.637	3	33	2
LP22_7	0.0827	22.3	84.3735	13	26	14
LP22_16	0.0264	11	115.959	6	33	4
LP22_7	0.0125	13	86.511	5	26	4
LP22_16	0.0115	19.8	87.5932	4	33	16
LP22_7	0.0534	15.1	79.7289	15	26	13
LP22_16	0.0175	17	92.6567	4	33	9
LP22_7	0.025	11	79.8337	8	26	3
LP22_16	0.0071	17.2	98.1531	3	33	7
LP22_7	0.0617	13.4	87.6515	10	26	5
LP22_16	0.0093	11.5	127.442	3	33	5
LP22_7	0.1299	26.2	84.0326	28	26	15
LP22_16	0.029	12.5	102.788	4	33	7
LP22_7	0.0319	16	91.1628	6	26	10
LP22_16	0.0089	10.2	121.24	3	33	5
LP22_7	0.1015	16	96.035	25	26	11
LP22_16	0.0145	13.2	97.3172	3	33	9
LP22_7	0.02	12	71.4888	7	26	4
LP22_16	0.0809	27	106.138	7	33	10
LP22_16	0.0268	22.7	116.232	6	33	14
LP22_16	0.0103	18	101.473	4	33	7
LP22_16	0.0051	8.4	103.524	3	33	6
LP22_7	0.0043	9.1	80.7094	3	26	1
LP22_16	0.071	17.2	102.084	6	33	11
LP22_16	0.0375	15.5	119.528	7	33	8
LP22_16	0.053	24	107.531	6	33	9
LP22_16	0.0117	15	111.047	5	33	9
LP22_16	0.0308	7.5	114.137	4	33	7
LP22_7	0.032	18	74.1621	16	26	5
LP22_16	0.0096	12	92.8139	4	33	6
LP22_7	0.0273	21.1	327.449	12	26	12
LP22_16	0.0145	18.2	118.353	3	33	8
LP22_7	0.079	17	68.2549	15	26	17
LP22_16	0.0839	25	100.88	8	33	23
LP22_7	0.0411	17	72.2215	22	26	6
LP22_16	0.0063	19	114.689	3	33	6
LP22_7	0.0167	12	83.5522	5	26	6
LP22_16	0.0188	17.3	111.384	5	33	7
LP22_7	0.1369	16.5	125.098	27	26	18
LP22_16		19		3	33	8
LP24_16	0.0277	17.3	99.8523	5	32	5
LP24_8	0.0601	12.5	109.559	14	56	9
LP24_16	0.0244	10	117.971	6	32	7
LP24_8	0.0303	9.3	123.111	7	56	4
LP24_16	0.0245	9	103.581	5	32	5
LP24_8	0.0506	10.5	115.822	8	56	6
LP24_16	0.0173	12	98.1843	5	32	9
LP24_8	0.1625	19	86.5314	14	56	9
LP24_16	0.047	15.2	107.029	12	32	9
LP24_8	0.0529	10	134.157	7	56	9
LP24_16	0.0263	13	99.4407	5	32	6
LP24_8	0.0237	8	112.738	6	56	5
LP24_16	0.0687	18.2	94.7834	13	32	13
LP24_8	0.0303	8.5	92.9558	7	56	4
LP24_16	0.0942	22.2	80.3335	9	32	14
LP24_8	0.0192	8.2	82.379	5	56	2
LP24_16	0.0163	14	87.7024	4	32	4
LP24_8	0.0266	6.2	85.7967	7	56	4
LP24_16	0.0812	16.3	82.218	6	32	9
LP24_8	0.0542	12.5	82.5965	6	56	9
LP24_16	0.0116	10	86.8821	4	32	4
LP24_8	0.0594	13	106.343	7	56	8
LP24_16	0.041	11.8	99.6723	5	32	7
LP24_8	0.0309	10	96.0947	6	56	7
LP24_16	0.0082	7.5	118.629	3	32	3
LP24_8	0.0984	15	90.7737	9	56	8
LP24_16	0.009	12.3	93.645	3	32	5
LP24_8	0.047	13.5	95.9433	8	56	9
LP24_16	0.0276	18	67.6851	5	32	10
LP24_8	0.053	14.6	94.6661	6	56	11
LP24_16	0.0172	10.5	83.2512	5	32	4
LP24_8	0.063	16	949.99	8	56	9
LP24_16	0.0415	19.2	103.827	5	32	12
LP24_8	0.1668	20.2	94.72	21	56	19
LP24_16	0.0238	15	99.613	5	32	9
LP24_8	0.1162	16.7	99.9301	14	56	14
LP24_16	0.0499	18.5	83.2736	7	32	8
LP24_8	0.099	18.5	99.1897	11	56	12
LP24_16	0.0532	12.5	90.5519	8	32	9
LP24_8	0.0392	16	96.3264	5	56	7
LP24_16	0.0123	13.5		4	32	6
LP24_8	0.1742	19.3	81.3766	13	56	16
LP24_16	0.0088	13.3		4	32	2
LP24_8	0.1067	21	88.5624	15	56	15
LP24_16	0.005	10.6	95.1944	3	32	8
LP24_8	0.0661	9.8	105.739	15	56	7
LP24_16	0.0172	12		5	32	3
LP24_8	0.1155	20.8	101.287	11	56	6
LP24_16	0.0081	14	18.6737	5	32	5
LP24_8	0.0724	19	96.0058	7	56	9
LP24_16	0.0552	15	88.4404	16	32	11
LP24_8	0.12302	20.8	111.011	14	56	13
LP24_8	0.1504	20.5	94.8734	16	56	19
LP24_8	0.1491	23.6	74.6152	8	56	18
LP24_8	0.0553	14.8	102.947	9	56	5
LP24_8	0.0587	13	104.588	7	56	7
LP24_8	0.1312	20.3	91.0841	11	56	13
LP24_8	0.1435	16.5	84.5249	10	56	10
LP24_8	0.1334	19.8	94.8084	10	56	10
LP24_16	0.0189	10	106.101	5	32	10
LP24_8	0.0405	9	84.6665	7	56	4
LP24_8	0.0916	14.8	101.332	10	56	7
LP24_8	0.1042	14.5	101.765	7	56	10
LP24_8	0.0524	12.5	79.3284	7	56	6
LP24_8	0.0674	16	98.2636	10	56	7
LP24_8	0.0924	16	77.9542	8	56	8
LP24_8	0.1024	18	97.614	8	56	12
LP24_8	0.2611	25.7	88.9018	15	56	17
LP24_8	0.0753	18	117.324	8	56	9
LP24_8	0.1685	24.8	64.9614	15	56	21
LP24_8	0.1408	28.3	81.2944	8	56	11
LP24_16	0.0253	14	102.66	5	32	8
LP24_8	0.0422	10.8	104.692	8	56	6
LP24_8	0.1036	26.2	88.7338	8	56	12
LP24_8	0.1145	19.1	88.8184	10	56	14
LP24_8	0.1191	19.5	90.3436	13	56	13
LP24_8	0.1578	19.2	92.1994	15	56	15
LP24_8	0.2628	25.7	75.7904	18	56	18
LP24_8	0.1345	22	92.3451	15	56	12
LP24_8	0.1947	21	70.7089	20	56	9
LP24_16	0.0264	10.2	94.7615	5	32	8
LP24_8	0.0217	6.5	119.424	6	56	3
LP24_16	0.0316	15	101.894	7	32	10
LP24_8	0.016	6.6	126.006	5	56	6
LP24_16	0.0372	17	101.939	6	32	16
LP24_8	0.0133	7.1	111.899	4	56	2
LP24_16	0.0121	17.2	96.939	4	32	6
LP24_8	0.0278	8	119.325	6	56	5
LP25_11	0.0602	19.4	113.402	7	32	15
LP25_10	0.1027	21	97.4247	11	28	10
LP25_11	0.0809	14.3	112.31	7	32	7
LP25_10	0.0131	12.5	172.843	5	28	6
LP25_11	0.089	17	97.1143	7	32	10
LP25_10	0.0078	13.4	84.4644	4	28	2
LP25_11	0.0357	12	118.415	7	32	5
LP25_10	0.0554	17.2	124.87	13	28	14
LP25_11	0.1145	16	94.4562	8	32	11
LP25_10	0.086	18.5	111.643	12	28	13
LP25_11	0.029	13.5	104.823	5	32	5
LP25_10	0.0873	17.5	128.082	9	28	13
LP25_11	0.0586	12.8	196.968	16	32	7
LP25_10	0.0163	16.5	143.295	5	28	7
LP25_11	0.1329	18.7	131.961	16	32	20
LP25_10	0.0532	17.4	121.759	9	28	10
LP25_11	0.0438	11.6	115.588	7	32	6
LP25_10	0.0373	15.5	100.213	7	28	7
LP25_11	0.1391	19.2	99.6002	8	32	10
LP25_10	0.0489	19.3	109.672	7	28	10
LP25_11	0.0245	11.8	98.6357	5	32	9
LP25_10	0.0588	18	113.562	7	28	13
LP25_11	0.0801	12.3	101.134	8	32	10
LP25_10	0.0198	11	126.144	5	28	6
LP25_11	0.0769	19	92.5653	8	32	12
LP25_10	0.0443	10	121.604	8	28	2
LP25_11	0.0531	18.2	95.4324	7	32	10
LP25_10	0.0451	18	118.362	5	28	8
LP25_11	0.0874	17.2	112.966	8	32	11
LP25_10	0.1301	20.8	108.703	8	28	19
LP25_11	0.0426	13.2	91.7364	7	32	6
LP25_10	0.1114	16	147.53	9	28	10
LP25_11	0.0365	14	119.452	6	32	9
LP25_10	0.0603	21	119.363	18	28	10
LP25_11	0.0283	12	107.846	6	32	7
LP25_10	0.0258	18	128.426	5	28	7
LP25_11	0.035	19.7	86.322	5	32	10
LP25_10	0.0133	14	83.5806	5	28	6
LP25_11	0.0525	20.3	93.9803	13	32	14
LP25_10	0.0811	13.5	102.071	9	28	8
LP25_11	0.0557	13.3	90.5035	7	32	4
LP25_10	0.011	15.7	107.489	4	28	4
LP25_11	0.0266	12.4	104.435	5	32	9
LP25_11	0.0574	13.8	98.1624	7	32	10
LP25_10	0.0325	10.3	129.861	10	28	1
LP25_11	0.0124	8.2	103.306	5	32	2
LP25_11	0.0163	8.6	87.6558	5	32	2
LP25_11	0.0105	5.9	99.031	7	32
LP25_11	0.0712	20.8	85.7568	10	32	15
LP25_10	0.0064	6	114.026	4	28	2
LP25_11	0.166	20.7	84.809	17	32	19
LP25_10	0.0096	16.8	135.508	4	28	8
LP25_11	0.0284	11.2	95.3533	6	32	8
LP25_10	0.0884	22	97.0099	11	28	15
LP25_11	0.0351	13.6	78.8619	6	32	8
LP25_10	0.0102	16.5		5	28	5
LP25_11	0.1335	16	107.485	11	32	8
LP25_10	0.0325	11	118.77	5	28	2
LP25_11	0.0621	11	76.4583	5	32	3
LP25_10	0.0189	11.7	131.85	6	28	3
LP3_15	0.0487	17.8	89.567	5	42	8
LP3_12	0.0412	12	106.409	5	29	5
LP3_15	0.0359	9	80.3527	7	42	5
LP3_12	0.051	11.2	88.235	12	29	3
LP3_15	0.1362	22.2	72.3915	8	42	17
LP3_12	0.0476	13	80.6366	13	29	2
LP3_15	0.0189	7.3	81.0181	8	42	3
LP3_12	0.0185	12	76.3317	7	29	2
LP3_15	0.0341	11.6	114.207	5	42	4
LP3_12	0.0387	11.2	90.8168	4	29	4
LP3_15	0.0286	10	87.9087	9	42	1
LP3_12	0.0111	13.6	81.18	6	29	5
LP3_15	0.0135	10.2	65.2893	4	42	4
LP3_12	0.0149	7.6	78.5163	3	29	2
LP3_15	0.0423	10.5	84.9223	5	42	3
LP3_12	0.0034	8.8	84.2078	3	29
LP3_15	0.0162	7.5	90.4667	7	42	2
LP3_12	0.0074	9	80.9566	4	29	1
LP3_15	0.0058	7.3	105.709	4	42	1
LP3_12	0.0025	7.2	60.97	2	29	2
LP3_15	0.0164	7	100.627	4	42	4
LP3_12	0.0046	8.7	69.085	3	29
LP3_15	0.028	11	84.9503	6	42	11
LP3_12	0.0203	10.1	113.695	4	29	5
LP3_15	0.0072	7.7	119.965	4	42	2
LP3_12	0.049	25.5	75.1914	11	29	9
LP3_15	0.0196	12.2	82.3422	3	42	4
LP3_12	0.0653	17	85.3302	5	29	6
LP3_15	0.0066	8.5	92.0978	3	42	2
LP3_12	0.0451	12.1	73.0117	5	29	4
LP3_15	0.0197	8.6	71.5488	7	42	2
LP3_12	0.0208	17.3	72.4	4	29	4
LP3_15	0.0466	13.1	67.1868	5	42	5
LP3_12	0.0478	19	68.5111	7	29	4
LP3_15	0.0235	7.2	81.0306	7	42	2
LP3_12	0.0173	10.5	85.4131	4	29
LP3_15	0.0313	8.2	92.132	5	42	4
LP3_12	0.0558	16.8	79.4509	4	29	6
LP3_15	0.0304	13	85.0486	4	42	6
LP3_12	0.0525	20	119.151	5	29	3
LP3_15	0.0275	11.8	58.4557	4	42	4
LP3_12	0.0464	14.7	78.8714	5	29	5
LP3_15	0.0113	6	96.7923	4	42
LP3_12	0.004	15.7	83.9619	4	29	1
LP3_15	0.0483	13.5	17.5417	6	42	10
LP3_12	0.0122	8.5	93.6466	4	29	1
LP3_15	0.0048	4.7	90.9148	3	42
LP3_15	0.0293	14.4	59.0847	7	42	4
LP3_15	0.052	10.7	89.3921	6	42	7
LP3_15	0.0618	11	86.8462	13	42	3
LP3_15	0.0411	14.7	81.0238	4	42	1
LP3_15	0.0267	8	63.734	4	42	2
LP3_15	0.0761	15	67.5407	9	42	7
LP3_15	0.0409	9	97.9356	7	42	4
LP3_15	0.0347	13.7	92.7635	6	42	4
LP3_15	0.0631	11	71.3276	7	42	2
LP3_15	0.0302	14.2	110.232	5	42	11
LP3_12	0.0456	11.2	79.5992	5	29	1
LP3_15	0.0793	13.8	92.6302	6	42	4
LP3_15	0.0654	11.7	78.4953	14	42	5
LP3_15	0.0955	13.3	83.1275	6	42	8
LP3_15	0.034	15.2	76.0428	6	42	12
LP3_12	0.0312	12.5	85.9139	4	29	5
LP3_15	0.0581	19.5	79.3679	7	42	12
LP3_12	0.0137	8.3	88.5652	3	29	4
LP3_15	0.0394	9.5	93.903	8	42	4
LP3_12	0.0243	14.8	74.2478	3	29	4
LP3_15	0.0589	11.5	96.4374	6	42	7
LP3_12	0.0712	10.5	83.5331	3	29	4
LP3_15	0.0354	17.2	80.6255	7	42	7
LP3_12	0.0109	9.5	93.1062	3	29	3
LP4_14	0.0222	9.5	60.4611	4	24	3
LP4_14	0.016	7.7	65.5258	4	24	5
LP4_14	0.0222	5.2	85.3585	4	24	2
LP4_14	0.0078	7.7	97.7443	3	24	3
LP4_14	0.0133	9	82.4576	4	24	1
LP4_14	0.0217	9.5	77.8173	7	24	1
LP4_14	0.0218	10.8	63.0662	5	24	4
LP4_14	0.02	9.5	61.6188	5	24	2
LP4_14	0.0044	7	101.682	3	24
LP4_14	0.0096	12		1	24	2
LP4_14	0.0179	8.6	79.2219	5	24	1
LP4_14	0.0108	11.1	63.1639	3	24	3
LP4_14	0.0254	7.5	78.1529	6	24	3
LP4_14	0.014	5	95.6779	5	24	1
LP4_14	0.0134	8.1	64.2208	3	24	1
LP4_14	0.0223	11.5	78.7482	4	24	3
LP4_14	0.0288	10.2	72.615	5	24	3
LP4_14	0.028	15.1	97.2635	4	24	2
LP4_14	0.0419	15	83.7042	5	24	3
LP4_14	0.0431	14.3	94.9568	5	24	4
LP4_14	0.0355	11.8	77.2672	5	24	2
LP4_14	0.0307	13.2	90.6247	4	24	2
LP4_14	0.0034	13.5	159.451	6	24
LP4_14	0.0189	9	82.4064	4	24	4
LP5_3	0.0616	10.5	93.4328	6	33	5
LP5_3	0.0286	10	95.4349	9	33	4
LP5_3	0.0108	9.7	65.9262	3	33	2
LP5_3	0.01	11.8	80.6308	3	33	3
LP5_3	0.0484	15	80.6007	5	33	5
LP5_3	0.0242	11.3	117.045	3	33	4
LP5_3	0.0111	6.9	108.339	4	33
LP5_3	0.037	17	87.7922	4	33	5
LP5_3	0.0118	9.8	89.3352	3	33	3
LP5_3	0.0476	12	71.2078	5	33	2
LP5_3	0.0538	17.5	106.208	6	33	5
LP5_3	0.0575	15.2	82.3246	5	33	5
LP5_3	0.0219	11.5	61.3166	5	33	1
LP5_3	0.0618	15.7	98.2467	6	33	6
LP5_3	0.0126	11.5	91.3326	4	33	3
LP5_3	0.0152	13	99.7898	3	33	4
LP5_3	0.0057	9.3	85.0218	3	33
LP5_3	0.0201	10.8	122.062	5	33	1
LP5_3	0.0036	6.5	154.863	3	33
LP5_3	0.0492	13.6	88.7934	4	33	4
LP5_3	0.0051	9.7	61.9582	2	33	3
LP5_3	0.0329	12	109.235	9	33	3
LP5_3	0.0322	15.4	99.9139	5	33	5
LP5_3	0.0249	10.5	116.764	5	33	1
LP5_3	0.0205	8.2	89.7535	4	33	3
LP5_3	0.1204	20	87.2665	8	33	5
LP5_3	0.0581	17	94.5371	8	33	3
LP5_3	0.0496	15	86.3228	10	33	6
LP5_3	0.1297	15.2	20.5343	12	33	7
LP5_3	0.0209	16	115.218	7	33	2
LP5_3	0.0308	11.6	104.702	9	33	1
LP5_3	0.0243	9.3	95.8641	5	33	4
LP5_3	0.0567	11	107.137	6	33	5
LP9_6	0.0416	9.2	119.781	11	32	1
LP9_6	0.0171	10.4	62.3842	4	32	2
LP9_6	0.0127	10.5	84.68	4	32	3
LP9_6	0.0204	14.6	41.7413	3	32	4
LP9_6	0.044	12	125.747	5	32	2
LP9_6	0.0474	11.2	108.047	6	32	2
LP9_6	0.0322	11.5	106.166	4	32	4
LP9_6	0.0164	7.8	108.926	4	32	2
LP9_6	0.0273	8.1	85.6458	5	32	2
LP9_6	0.042	9.7	89.4751	6	32	2
LP9_6	0.0359	16.5	85.399	4	32	4
LP9_6	0.0468	12.5	105.225	7	32	2
LP9_6	0.0503	11.5	91.6391	5	32	3
LP9_6	0.0293	13	94.8538	4	32	3
LP9_6	0.0522	14	93.8503	5	32	5
LP9_6	0.0357	12.3	105.515	5	32	5
LP9_6	0.0248	12	111.837	4	32	1
LP9_6	0.0097	7.7	108.635	4	32	3
LP9_6	0.0507	11.5	105.213	5	32	3
LP9_6	0.0272	10.8	83.0141	4	32	4
LP9_6	0.02	9	84.8706	5	32	2
LP9_6	0.0393	10.8	110.428	4	32	3
LP9_6	0.0219	9.1	97.8394	4	32	2
LP9_6	0.0721	15	85.7509	9	32	6
LP9_6	0.1063	19.9	84.3069	19	32	7
LP9_6	0.021	9.1	82.5619	5	32	3
LP9_6	0.0382	11.6	91.6567	5	32	5
LP9_6	0.0223	6.6	80.6274	5	32	2
LP9_6	0.0266	5	173.033	11.1	32	4
LP9_6	0.0376	9.2	84.7948	5	32	3
LP9_6	0.0155	8	94.9883	4	32	3
LP9_6	0.022	8.9	125.563	5	32	2

## Sheet: Plot data
Appendix 1
Intraspecific trait variability determines understorey plant community assembly
Piotr Olszewski, Radosław Puchałka, Piotr Sewerniak, Marcin Koprowski, Werner Ulrich
Table S2: Sub-plot data of 1315 single Impatiens parviflora ramets from 41 sub-plots. SWC: soil water content, TOC: total soil organic matter content, N: soil nitrogen content.
Sub-plot	Mean LDW (g)	CV leaves	Total LDW	Variance in LDW	Skewness in LDW	Mean SH (cm)	CV Stalk	Total SH (cm)	Variance in SH	Skewness in SH	Mean SLA	CV SLA	Total SLA	Variance in SLA	Skewness in SLA	Mean number of flowers	CV flowers	Total number of flowers	Variance in flower number	Skewness of flower numbers	SWC %)	TOC (%)	N (%)	TOC / N	Ca (cmolxl-1)	Mg (cmolxl-1)	K (cmolxl-1)	Na (cmolxl-1)	Nother	NI	Sother
B14_7	0.129021	0.000568578	4.3867	0.0102724	0.608802	18.2765	1.17532	621.4	27.7	-0.581622	132.602	-141.849	4508.48	157.893	5.39411	10.9706	29.559	373	67.9082	1.26305	5.56667	1.93	0.1185	16.2869	3.7365	0.295	0.0695	0.011	6	29	2
B15_10	0.197593	-0.0100125	2.7663	0.0128444	0.239521	20.1857	-8.00904	282.6	22.9936	-0.744814	117.353	-82.5031	1642.95	211.932	0.000916467	14	-15.1077	196	46.7692	0.0774412	6.98333	2.42	0.142	17.0423	2.4585	0.2125	0.0625	0.011	0	14	0
B7_13	0.05594	-0.000436992	1.6782	0.00137201	2.14651	15.3167	-3.01335	459.5	17.0863	-0.0107166	80.6697	7.67298	2420.09	286.408	-1.54219	8.9	-2.58895	267	22.8517	0.670955	7.16667	1.625	0.0955	17.0157	1.43	0.1805	0.0925	0.006	24	32	5
B8_15	0.0452476	-0.000108859	0.9502	0.00107218	0.867997	13.6	-2.35169	285.6	14.326	-0.216106	99.8956	-116.143	2097.81	171.441	-0.585452	8.42857	0.793011	177	23.6571	0.463478	7.28333	2.26	0.138	16.3768	6.3145	0.563	0.123	0.011	8	27	2
B10_9	0.0530739	-0.000384575	2.4414	0.00124295	0.612132	16.9152	-8.61895	778.1	14.8707	-0.419793	130.559	-2.40969	6005.73	296.652	-0.54293	3.78049	-0.166529	155	4.57561	0.300647	7.03333	2.07	0.1315	15.7414	3.0875	0.3115	0.1075	0.014	35	35	4
B11_11	0.0957778	0.00449683	2.586	0.00982845	1.35398	14.8815	21.1336	401.8	40.3439	-0.455613	360.362	5.7596	9729.77	352.676	2.27946	6.32	9.56332	158	22.56	1.30492	7.01667	2.22	0.1325	16.7547	1.9015	0.2115	0.0815	0.011	25	45	4
B12_13	0.0524179	0.00137623	3.512	0.00296357	3.40485	14.6134	5.73467	979.1	24.4045	0.360211	124.972	90.9534	8373.12	388.109	-2.65833	3.9661	0.340824	234	5.55056	2.13817	6	1.85	0.117	15.812	3.684	0.3285	0.0875	0.007	13	58	5
B13_5	0.07873	-5.06785e-05	0.7873	0.00354482	0.30652	13.51	14.5829	135.1	31.0877	-0.140393	127.51	-16.2913	1275.1	281.739	1.05207	4	0.258102	40	5.55556	-0.0636396	7.13333	2.57	0.153	16.7974	5.833	0.612	0.1645	0.014	23	18	5
B21_13	0.057419	-0.000716502	1.2058	0.00118992	1.282	13.8048	-7.64813	289.9	9.42548	0.0630491	118.926	-99.4885	2497.46	195.521	-0.282419	5.95238	-1.80735	125	9.74762	0.56084	7.26667	2.055	0.1135	18.1057	2.9985	0.23	0.0855	0.0105	15	26	5
B22_14	0.0990769	-0.000899658	1.288	0.00480752	0.540146	16.3846	-3.79175	213	18.5514	0.223753	111.473	-154.035	1449.14	138.196	0.188458	8.53846	3.81656	111	27.2692	0.47193	6.16667	2.565	0.148	17.3311	2.8845	0.2675	0.077	0.008	4	19	3
B23_16	0.0985133	0.00113037	1.4777	0.00677249	0.916066	18.78	7.16214	281.7	34.8431	-0.108566	101.581	237.181	1523.72	525.469	-2.31054	11.7333	14.1686	176	57.9238	0.60854	7.06667	2.105	0.118	17.839	3.6285	0.354	0.082	0.007	4	10	4
B24_6	0.0742962	-0.000631844	1.9317	0.00256822	0.755959	16.3577	-7.91421	425.3	14.3713	-0.48019	103.972	-198.263	2703.28	91.0067	0.244877	7.42308	-2.6063	193	15.2138	0.578555	5.58333	2.82	0.157	17.9618	2.1535	0.211	0.0765	0.004	13	31	4
B25_9	0.0948778	-0.000729227	0.8539	0.00450217	0.06833	15.2111	4.39104	136.9	24.2736	0.80089	106.602	-148.544	959.421	141.785	0.996281	10	2.0239	90	34	0.510713	5.38333	1.39	0.075	18.5333	0.921	0.1155	0.053	0.004	1	9	1
B4_3	0.109418	0.00156266	3.0637	0.00853028	1.18549	16.9786	7.37388	475.4	31.0017	0.266864	115.04	290.721	3221.11	584.3	-2.37409	4.10714	1.11236	115	6.6918	1.21402	8.71667	2.56	0.1485	17.2391	4.883	0.4985	0.1025	0.007	11	37	6
B5_16	0.096887	-0.0023645	2.2284	0.00309195	0.922808	18.4217	-11.2174	423.7	15.6391	-0.331724	111.678	-184.905	2568.59	107.405	0.00373487	6.08696	-5.26282	140	6.81028	0.618777	6.43333	1.275	0.076	16.7763	1.014	0.1215	0.057	0.03	33	50	6
B6_5	0.0624852	0.000418445	1.6871	0.00267803	1.28568	13.7889	6.27362	372.3	23.3164	-0.0376289	116.253	-84.0888	3138.84	209.942	0.423606	4.4	1.19659	110	7.58333	0.988953	6.66667	1.855	0.1105	16.7873	1.7285	0.208	0.0995	0.007	21	30	5
B7_6	0.0824065	-3.10316e-05	2.5546	0.0039099	1.70381	18.3452	-1.75751	568.7	24.9239	0.583669	123.167	72.6491	3818.19	369.174	0.346734	5.54839	2.38937	172	12.4559	0.863338	7.16667	1.625	0.0955	17.0157	1.43	0.1805	0.0925	0.006	7	39	2
B8_14	0.0573842	0.00121794	1.0903	0.00312204	2.11701	12.7368	-1.05596	242	13.9902	0.0612496	135.139	-84.6902	2567.64	215.883	-0.550646	3.625	2.54962	58	6.91667	1.52277	7.28333	2.26	0.138	16.3768	6.3145	0.563	0.123	0.011	12	21	3
B9_6	0.0861937	0.00183885	2.7582	0.00615228	1.19725	17.4844	19.9158	559.5	44.6581	0.161766	118.886	-25.466	3804.35	269.529	0.0539096	4.8125	7.63961	154	15.254	1.26957	7.6	1.785	0.0945	18.8889	0.842	0.1115	0.0565	0.01	8	34	4
P12_14	0.0373118	-7.27173e-05	0.6343	0.000728826	1.33211	10.3882	-0.630874	176.6	10.2949	-0.566695	67.819	-122.548	1152.92	149.204	0.96422	4.125	0.222866	66	5.85	0.608815	5.31667	1.695	0.1085	15.6221	0.405	0.0865	0.0685	0.0135	0	23	0
P13_4	0.0308167	0.000479681	0.5547	0.00102541	1.41464	9.79474	7.92649	186.1	17.8883	0.625508	61.3755	-73.2214	1104.76	194.594	-1.43518	5.375	14.258	86	23.7167	0.903033	5.71667	1.725	0.12	14.375	0.5425	0.1175	0.069	0.0115	9	27	1
P13_13	0.0657941	0.00298627	1.1185	0.0054928	1.27413	26.1059	7.82358	443.8	54.2493	0.392207	85.402	-87.8656	1366.43	193.202	-0.887385	15.2353	-42.8519	259	30.1912	-0.0953059	5.71667	1.725	0.12	14.375	0.5425	0.1175	0.069	0.0115	0	26	0
P16_1	0.0285158	-6.17608e-05	0.5418	0.000405155	1.37844	16.844	-2.79778	421.1	20.5367	0.645778	105.95	-63.1538	2013.05	226.914	-0.595847	8.16	-8.89996	204	12.5567	0.418591	6.43333	1.72	0.1055	16.3033	0.4635	0.1155	0.0965	0.012	3	19	2
P17_8	0.122643	-0.00361002	2.5755	0.00515369	1.85286	21.1429	-10.8441	444	22.4976	0.351142	84.8197	169.166	1781.21	449.953	3.16123	14.7143	-3.90854	309	64.3143	0.769415	5.6	1.855	0.1215	15.2675	0.3945	0.102	0.0835	0.014	1	28	1
P18_8	0.0668741	-2.64136e-05	1.8056	0.0025635	0.810218	14.8519	14.7608	401	33.9111	0.743891	70.2499	15.5656	1896.75	288.721	-0.230104	8.51852	11.3755	230	34.7208	1.17758	6.35	1.51	0.101	14.9505	0.4365	0.1175	0.107	0.0135	1	43	1
P19_1	0.0779947	-0.000297913	1.4819	0.00323041	0.602059	24.8192	21.9126	645.3	64.7968	1.69608	81.4854	28.8238	1548.22	307.969	-0.763584	14.3462	6.44107	373	71.3554	0.563162	7.21667	1.85	0.1195	15.4812	0.324	0.09	0.11	0.016	0	35	0
P19_16	0.019819	7.425e-05	0.4162	0.000298976	1.53715	15.7522	-5.85332	362.3	15.1508	0.0404861	91.8405	-26.5233	1928.65	257.547	-0.72106	10.3478	-16.9576	238	17.2372	0.126139	7.21667	1.85	0.1195	15.4812	0.324	0.09	0.11	0.016	17	56	2
P2_10	0.0390591	0.000138935	1.7186	0.00101771	1.36717	15.5432	-3.45086	683.9	17.1174	0.101666	207.071	353.351	9111.11	673.274	6.63114	4.31818	-0.305925	190	5.84989	1.29225	10.65	1.41	0.0905	15.5801	0.461	0.0985	0.132	0.008	41	70	3
P20_16	0.0521871	0.000377219	1.6178	0.00195055	1.38973	17.4194	-1.40174	540	23.1963	0.525779	92.4761	1686.44	2404.38	1970.8	4.4887	10.871	16.2472	337	53.9161	1.83161	7.63333	2.42	0.1575	15.3651	0.8155	0.1325	0.1145	0.0185	14	43	3
P21_15	0.111479	0.00924851	4.7936	0.0164825	2.61695	17.9628	11.837	772.4	37.6505	0.941442	77.6564	-105.451	3339.23	171.737	0.707128	13.2326	62.8804	569	118.278	2.2264	6.25	2.2	0.1815	12.1212	2.3065	0.242	0.1055	0.022	11	41	4
P22_7	0.0756462	0.000758052	1.9668	0.00407607	1.5617	17.15	-5.96009	445.9	18.0434	0.141716	89.616	2238.12	2330.02	2521.17	4.58043	12.6154	12.8442	328	63.2862	0.885593	8.93333	2.25	0.1745	12.894	1.054	0.221	0.1345	0.0185	3	25	1
P22_16	0.0297633	0.000296574	0.8929	0.000805456	1.22083	17.2212	3.95031	568.3	28.1105	0.121567	105.912	-149.745	3177.37	140.308	0.498061	8.9697	-5.92773	296	19.9053	1.46646	8.93333	2.25	0.1745	12.894	1.054	0.221	0.1345	0.0185	0	30	0
P24_16	0.0302719	-4.88772e-05	0.9687	0.000477632	1.33647	13.8844	-5.58902	444.3	11.6394	0.341331	93.2666	39.674	2704.73	324.385	-2.60088	7.65625	-7.73438	245	11.2006	0.496016	7.83333	2.665	0.195	13.6667	1.0485	0.175	0.1135	0.0195	3	36	1
P24_8	0.0922754	-0.00152408	5.16742	0.00342289	0.894279	15.8339	11.2919	886.7	32.4674	0.0904628	111.692	-292.315	6254.74		7.30622	9.64286	-8.55841	540	21.2156	0.57823	7.83333	2.665	0.195	13.6667	1.0485	0.175	0.1135	0.0195	2	56	1
P25_11	0.0617438	-0.000626002	1.9758	0.00158001	1.03426	14.6156	-3.45611	467.7	15.2181	-0.0792707	103.016	158.786	3296.52	447.666	2.93227	9.09677	-7.73234	282	18.8237	0.670605	8.68333	3.195	0.235	13.5957	2.072	0.261	0.133	0.028	19	33	3
P25_10	0.0466964	-1.49736e-05	1.3075	0.00124331	0.767461	15.6821	-5.71987	439.1	15.1378	-0.517067	118.449	74.0983	3198.13	368.934	0.572741	7.89286	0.591662	221	20.6918	0.43843	8.68333	3.195	0.235	13.5957	2.072	0.261	0.133	0.028	15	25	3
P3_15	0.03865	-0.000184716	1.6233	0.000675658	1.55815	11.4119	1.22406	479.3	13.8869	0.713737	83.6423	20.531	3512.98	300.744	-1.10446	5.2	4.12073	208	12.9846	1.3486	10.25	1.94	0.125	15.52	0.628	0.1385	0.102	0.0095	22	48	3
P3_12	0.0301483	-0.000100078	0.8743	0.000422119	0.267385	12.7	3.04208	368.3	18.02	1.15942	83.8257	-119.87	2430.94	160.433	1.14409	3.65385	-0.840104	95	3.59538	0.619231	10.25	1.94	0.125	15.52	0.628	0.1385	0.102	0.0095	36	51	5
P4_14	0.0205458	-0.00013033	0.4931	0.000111267	0.485368	10.075	-2.35101	241.8	8.06196	0.156645	83.1829	157.276	1913.21	437.264	2.22028	2.5	-0.797084	55	1.30952	0.314591	9.9	1.84	0.128	14.375	1.4185	0.1535	0.124	0.011	35	35	6
P5_3	0.0363212	9.72098e-05	1.1986	0.000856555	1.69771	12.4091	-3.97883	409.5	10.464	0.341386	92.9972	231.545	3068.91	516.135	-0.4641	3.66667	-1.8224	110	2.64368	-0.0878613	13.05	2.71	0.1875	14.4533	1.469	0.2605	0.2495	0.012	21	50	4
P9_6	0.0345781	-0.000320475	1.1065	0.000367397	1.85743	10.9062	-2.86998	349	8.92319	0.821675	97.3186	200.181	3114.19	486.668	0.845181	3.09375	-1.24139	99	1.95867	0.95268	9.18333	1.715	0.11	15.5909	0.5925	0.11	0.0805	0.0145	16	34	1
